# Supplementary material
Source: Frontiers journal article supplement (https://www.frontiersin.org/articles/569383)
Supplement: Table_1.XLSX [file Table_1.XLSX]

## Sheet: about
legend
blue tables	raw data
green tables	procedurally generated data
table	description
study details	scope of supply chain activities, peer-review status, and full citations for the footprint studies included in this review
product footprints	raw GHG, blue water, and land-use footprint data by study and product
aggregated footprints	footprints from Kim et al. (2019) and Poore & Nemecek (2019), reported as aggregated footprints from multiple sources and/or production scenarios (unhide tab to view)
product categories	product types, e.g., poultry meat, matched to their respective categories, e.g., terrestrial animal product (unhide tab to view)
wtd avg by study	average GHG, blue water, and land-use footprints by study and product type, weighted by the number of products included in each study
avg by product type	average GHG, blue water, and land-use footprints by product type, appended with aggregated footprints from Kim et al. (2019) and Poore & Nemecek (2019)
data flow diagram

## Sheet: study details
			scope of supply chain activities reported in Santo et al.
study	product type	peer-reviewed	production	processing	packaging	post-packaging	full citation or link
Avadi et al. (2015)	tuna (wild)	yes	yes	yes			Avadí, Angel, Carolina Bolaños, Isabel Sandoval, and Carla Ycaza. 2015. "Life cycle assessment of Ecuadorian processed tuna." The International Journal of Life Cycle Assessment 20, no. 10: 1415-1428.
Blonk et al. (2008)	plant-based meat substitute	no	yes	yes			Blonk, Hans, Anton Kool, Boki Luske, and Sytske de Waart. 2008. Environmental Effects of Protein-Rich Food Products in the Netherlands Consequences of Animal Protein Substitutes. http://www.bokiluske.com/publications/2008%20English%20summary%20protein-rich%20products.pdf
Dettling et al. (2016)	plant-based meat substitute	no	yes	yes			Dettling, Jon, Qingshi Tu, Mireille Faist, Andrea DelDuce, and Sarah Mandlebaum. 2016. A Comparative Life Cycle Assessment of Plant-Based Foods and Meat Foods. Boston, MA: Quantis USA. https://www.morningstarfarms.com/content/dam/morningstarfarms/pdf/MSFPlantBasedLCAReport_2016-04-10_Final.pdf
Fresán et al. (2019)	plant-based meat substitute	yes	yes	yes	yes		Fresán, Ujué, Maximino Alfredo Mejia, Winston J. Craig, Karen Jaceldo-Siegl, and Joan Sabaté. 2019b. "Meat analogs from different protein sources: a comparison of their sustainability and nutritional content." Sustainability 11 (12): 3231. doi:10.3390/su11123231.
Goldstein et al. (2017)	plant-based meat substitute	yes	yes	yes			Goldstein, Benjamin, Rebekah Moses, Norman Sammons, and Morten Birkved. 2017. "Potential to curb the environmental burdens of American beef consumption using a novel plant-based beef substitute." PloS One 12 (12). doi:10.1371/journal.pone.0189029.
Halloran et al. (2017)	insects	yes	yes	yes			Halloran, A., Y. Hanboonsong, Nanna Roos, and Sander Bruun. 2017. "Life cycle assessment of cricket farming in north-eastern Thailand." Journal of Cleaner Production 156: 83-94.
Head et al. (2011)	plant-based meat substitute	no	yes	yes			Head, Marieke, Maartje Sevenster, and Harry Croezen. 2011. Life Cycle Impacts of Protein-Rich Foods for Superwijzer: CE Delft. https://www.cedelft.eu/en/publications/1264/life-cycle-impacts-of-protein-rich-foods-for-the-superwijzer-app
Heller & Keoleian (2018)	plant-based meat substitute	no	yes	yes			Heller, Martin C. and Gregory A. Keoleian. 2018. Beyond Meat’s Beyond Burger Life Cycle Assessment: A Detailed Comparison between a Plant-Based and an Animal-Based Protein Source. Ann Arbor, Michigan: University of Michigan Center for Sustainable Systems. http://css.umich.edu/sites/default/files/publication/CSS18-10.pdf
Khan et al. (2019)	plant-based meat substitute	no	yes	yes			Khan, Sofia, Dettling, Jon, Loyola, Cristóbal, Hester, Joshua and Moses, Rebekah. 2019. "Environmental Life Cycle Analysis: Impossible Burger 2.0." Impossible Foods., last modified Mar 20, https://impossiblefoods.com/mission/lca-update-2019/.
Kim et al. (2019)	various; blue water footprints only	yes	yes				Brent Kim, Raychel Santo, Allysan Scatterday, Jillian Fry, Colleen Synk, Shannon Cebron, Mesfin Mekonnen, Arjen Hoekstra, Saskia de Pee, Martin Bloem, Roni Neff, and Keeve Nachman. 2019. "Country-specific dietary shifts to mitigate climate and water crises." Global Environmental Change.
Mattick et al. (2015)	cell-based meat	yes	yes	yes			Mattick, Carolyn S., Amy E. Landis, Braden R. Allenby, and Nicholas J. Genovese. 2015b. "Anticipatory life cycle analysis of in vitro biomass cultivation for cultured meat production in the united states." Environmental Science & Technology 49 (19): 11941-11949. doi:10.1021/acs.est.5b01614.
Miglietta et al. (2015)	insects	yes	yes	yes			Miglietta, Pier Paolo, Federica De Leo, Marcello Ruberti, and Stefania Massari. 2015. "Mealworms for food: a water footprint perspective." Water 7, no. 11: 6190-6203.
Oonincx & de Boer (2012)	insects	yes	yes				Oonincx, Dennis GAB, and Imke JM De Boer. 2012. "Environmental impact of the production of mealworms as a protein source for humans–a life cycle assessment." PloS one 7, no. 12.
Poore & Nemecek (2019)	various	yes	yes	yes			Poore, J., & Nemecek, T. 2018. “Reducing food’s environmental impacts through producers and consumers.” Science 360 (6392): 987-992.
Quorn Foods (2019)	plant-based meat substitute	no	yes	yes	yes		Quorn Foods. 2019. Quorn: Carbon Footprinting Emissions Report. https://www.quorn.co.uk/files/content/Carbon_Footprint_Results_UK.pdf
Seves et al. (2017)	plant-based meat substitute	yes	yes	yes	yes	yes	Seves, S. Marije, Janneke Verkaik-Kloosterman, Sander Biesbroek, and Elisabeth HM Temme. 2017. "Are more environmentally sustainable diets with less meat and dairy nutritionally adequate?" Public Health Nutrition 20 (11): 2050-2062. doi:10.1017/S1368980017000763.
Smetana et al. (2015)	cell-based meat	yes	yes	yes	yes	yes	Smetana, Sergiy, Alexander Mathys, Achim Knoch, and Volker Heinz. 2015. "Meat alternatives: life cycle assessment of most known meat substitutes." The International Journal of Life Cycle Assessment 20 (9): 1254-1267. doi:10.1007/s11367-015-0931-6.
Smetana et al. (2015)	plant-based meat substitute	yes	yes	yes	yes	yes	Smetana, Sergiy, Alexander Mathys, Achim Knoch, and Volker Heinz. 2015. "Meat alternatives: life cycle assessment of most known meat substitutes." The International Journal of Life Cycle Assessment 20 (9): 1254-1267. doi:10.1007/s11367-015-0931-6.
Tuomisto & Teixeira de Mattos (2011)	cell-based meat	yes	yes	yes			Tuomisto, Hanna L. and Teixeira de Mattos, M Joost. 2011. "Environmental impacts of cultured meat production." Environmental Science & Technology 45 (14): 6117-6123. doi:10.1021/es200130u.
Tuomisto et al. (2014)	cell-based meat	no	yes	yes			Tuomisto, H. L., Ellis, M., and Haastrup, P. (2014). “Environmental impacts of cultured meat: alternative production scenarios,” in 9th International Conference on Life Cycle Assessment in the Agri-Food Sector (San Francisco, CA). https://core.ac.uk/download/pdf/38629617.pdf
Zufia & Arana (2008)	tuna (wild)	yes	yes	yes			Zufia, J., and L. Arana. 2008. "Life cycle assessment to eco-design food products: industrial cooked dish case study." Journal of Cleaner Production 16, no. 17 (2008): 1915-1921.
Zhu & van Ierland (2010)	plant-based meat substitute	yes	yes	yes	yes	yes	Xueqin Zhu and Ekko C. van Ierland. 2004. "Protein Chains and Environmental Pressures: A Comparison of Pork and Novel Protein Foods." Environmental Sciences, 1:3, 254-276. DOI: 10.1080/15693430412331291652

## Sheet: product footprints
						footprint / kg							footprint / 100 g protein
study	product type	product	primary ingredient(s) / input(s), meat alternatives only	footprint type	number of products included	footprint as presented in study	study unit	footprint / kg	value description	lower footprint / kg	higher footprint / kg	range description	protein as presented in study or label	protein unit	g protein / kg	footprint / 100 g protein	lower footprint / 100 g protein	higher footprint / 100 g protein	notes
Avadi et al. (2015)	tuna (wild)	canned tuna in vegetable oil from Ecuador fishery	n/a	kg CO2e	1	3.7	kg CO2e / 1 kg	3.7	single product			n/a	265	g protein / 1 kg	265	1.39623			Protein content reported as 26.5%, using USDA numbers.
Avadi et al. (2015)	tuna (wild)	pouched tuna from Ecuador fishery	n/a	kg CO2e	1	2.7	kg CO2e / 1 kg	2.7	single product			n/a	282–292	g protein / 1 kg	287	0.940767	0.924658	0.957447	Mean value derived from average of min/max. Pretein content reported as 28.2–29.2%, using USDA numbers.
Blonk et al. (2008)	plant-based meat substitute	Quorn	mycoprotein (contains eggs)	kg CO2e	1	2240	kg CO2e / ton	2.24	single product			n/a	10	% protein by mass	100	2.24			Footprint value estimated from figure using graph grabber. Protein content was not reported; used protein content for mycoprotein-based meat analog (10% for final product, wet content), as reported in Smetana et al. (2015).
Blonk et al. (2008)	plant-based meat substitute	Quorn	mycoprotein (contains eggs)	m^2 year	1	1140	m^2 year / ton	1.14	single product			n/a	10	% protein by mass	100	1.14			Footprint value estimated from figure using graph grabber. Protein content was not reported; used protein content for mycoprotein-based meat analog (10% for final product, wet content), as reported in Smetana et al. (2015).
Dettling et al. (2016)	plant-based meat substitute	Morningstar Farms Grillers Crumbles	soy flour, contains eggs	kg CO2e	1	0.15928	kg CO2e / 60 g	2.65467	single product			n/a	18.5	g protein / 50 g	370	0.717477			Although the product has been modified to no longer contain eggs (as of 2019), the LCA was done prior to this modification so it's categorized as containing eggs. Multiplied percentage of carbon footprint contribution analysis related only to raw materials and manufacturing phases
Dettling et al. (2016)	plant-based meat substitute	Morningstar Farms Original Chik Patties	wheat gluten, soy flour, soy protein; contains eggs	kg CO2e	1	0.18738	kg CO2e / 60 g	3.123	single product			n/a	11.2	g protein / 71 g	157.746	1.97976			Although the product has been modified to no longer contain eggs (as of 09/2018), the LCA was done prior to this modification so it's categorized as containing eggs. Multiplied percentage of carbon footprint contribution analysis related only to raw materials and manufacturing phases
Dettling et al. (2016)	plant-based meat substitute	Morningstar Farms Grillers Original Burgers	wheat gluten, soy flour; contains eggs	kg CO2e	1	0.37672	kg CO2e / 60 g	6.27867	single product			n/a	23.9	g protein / 64 g	373.438	1.68132			Multiplied percentage of carbon footprint contribution analysis related only to raw materials and manufacturing phases
Dettling et al. (2016)	plant-based meat substitute	Morningstar Farms Original Sausage Patties	wheat gluten, soy protein, soy flour; contains eggs	kg CO2e	1	0.41236	kg CO2e / 60 g	6.87267	single product			n/a	25.8	g protein / 38 g	678.947	1.01225			Multiplied percentage of carbon footprint contribution analysis related only to raw materials and manufacturing phases
Dettling et al. (2016)	plant-based meat substitute	Morningstar Farms Grillers Crumbles	soy flour, contains eggs	L blue water footprint	1	0.00169	m^3 / 60 g serving	28.1667	single product			n/a	18.5	g protein / 50 g	370	7.61261
Dettling et al. (2016)	plant-based meat substitute	Morningstar Farms Original Chik Patties	wheat gluten, soy flour, soy protein; contains eggs	L blue water footprint	1	0.00213	m^3 / 60 g serving	35.5	single product			n/a	11.2	g protein / 71 g	157.746	22.5045
Dettling et al. (2016)	plant-based meat substitute	Morningstar Farms Grillers Original Burgers	wheat gluten, soy flour; contains eggs	L blue water footprint	1	0.00231	m^3 / 60 g serving	38.5	single product			n/a	23.9	g protein / 64 g	373.438	10.3096
Dettling et al. (2016)	plant-based meat substitute	Morningstar Farms Original Sausage Patties	wheat gluten, soy protein, soy flour; contains eggs	L blue water footprint	1	0.00264	m^3 / 60 g serving	44	single product			n/a	25.8	g protein / 38 g	678.947	6.48062
Dettling et al. (2016)	plant-based meat substitute	Morningstar Farms Grillers Crumbles	soy flour, contains eggs	m^2 year	1	0.06	m^2 year / 60 g	1	single product			n/a	18.5	g protein / 50 g	370	0.27027
Dettling et al. (2016)	plant-based meat substitute	Morningstar Farms Original Chik Patties	wheat gluten, soy flour, soy protein; contains eggs	m^2 year	1	0.11	m^2 year / 60 g	1.83333	single product			n/a	11.2	g protein / 71 g	157.746	1.1622
Dettling et al. (2016)	plant-based meat substitute	Morningstar Farms Grillers Original Burgers	wheat gluten, soy flour; contains eggs	m^2 year	1	0.3	m^2 year / 60 g	5	single product			n/a	23.9	g protein / 64 g	373.438	1.33891
Dettling et al. (2016)	plant-based meat substitute	Morningstar Farms Original Sausage Patties	wheat gluten, soy protein, soy flour; contains eggs	m^2 year	1	0.18	m^2 year / 60 g	3	single product			n/a	25.8	g protein / 38 g	678.947	0.44186
Fresán et al. (2019)	plant-based meat substitute	not specified	predominantly wheat	kg CO2e	41	0.2	kg CO2e / 100 g	2	mean of multiple products	0.9	3.2	min, max	0.19 (0.05-0.46)	kg CO2e / 20 g protein		0.95	0.25	2.3	g protein / kg not used; footprint per unit of protein was reportedly directly by study; most products were wheat and/or soy based, but a few were based on nuts
Fresán et al. (2019)	plant-based meat substitute	not specified	predominantly wheat	kg CO2e	15	0.27	kg CO2e / 100 g	2.7	mean of multiple products	1.9	3.9	min, max	0.29 (0.16-0.49)	kg CO2e / 20 g protein		1.45	0.8	2.45	g protein / kg not used; footprint per unit of protein was reportedly directly by study; most products were wheat and/or soy based, but a few were based on nuts
Goldstein et al. (2017)	plant-based meat substitute	Impossible Burger	soy protein	kg CO2e	1	6.93665	kg CO2e / kg	6.93665	single product			n/a	227.2	g protein / 1 kg	227.2	3.0531
Goldstein et al. (2017)	plant-based meat substitute	Impossible Burger	soy protein	L blue water footprint	1	0.18	m^3 / kg	180	single product			n/a	227.2	g protein / 1 kg	227.2	79.2254
Goldstein et al. (2017)	plant-based meat substitute	Impossible Burger	soy protein	m^2 year	1	3.5	m^2 year / kg	3.5	single product			n/a	227.2	g protein / 1 kg	227.2	1.54049
Halloran et al. (2017)	insects	farmed crickets from Thailand	n/a	kg CO2e	1	2.57	kg CO2e / kg	2.57	single product		2.61883	highest value from sensitivity analysis (no values were lower)	4.35	kg CO2e / 1 kg protein		0.435		0.443265	g protein / kg not used; footprint per unit of protein was reportedly directly by study
Halloran et al. (2017)	insects	farmed crickets from Thailand	n/a	L blue water footprint	1	0.42	m^3 / kg	420	single product		420.21	n/a	0.71	m^3 / 1 kg protein		71			g protein / kg not used; footprint per unit of protein was reportedly directly by study
Head et al. (2011)	plant-based meat substitute	Quorn	mycoprotein (contains eggs)	kg CO2e	1	2.4	kg CO2e / kg	2.4	single product			n/a	10	% protein by mass	100	2.4			Protein content was not reported; used protein content for mycoprotein meat analog (10% for final product, wet content), as reported in Smetana et al. (2015).
Head et al. (2011)	plant-based meat substitute	Quorn	mycoprotein (contains eggs)	m^2 year	1	0.41	m^2 year / kg	0.41	single product			n/a	10	% protein by mass	100	0.41			Protein content was not reported; used protein content for mycoprotein meat analog (10% for final product, wet content), as reported in Smetana et al. (2015).
Heller & Keoleian (2018)	plant-based meat substitute	Beyond Burger	pea protein	kg CO2e	1	0.27	kg CO2e / 1/4 lb	2.38099	single product	2.26718	2.49838	min, max of sensitivity analysis	20	g protein / 4 oz	176.37	1.35	1.28547	1.41655	Only reported here GHGe, land and water use from ingredients and processing phase.
Heller & Keoleian (2018)	plant-based meat substitute	Beyond Burger	pea protein	L blue water footprint	1	1.6	L / 1/4 lb	14.1096	single product	13.3872	14.8602	n/a	20	g protein / 4 oz	176.37	8	7.5904	8.4256	Only reported here GHGe, land and water use from ingredients and processing phase; reported absolute water use, not scarcity-weighted
Heller & Keoleian (2018)	plant-based meat substitute	Beyond Burger	pea protein	m^2 year	1	0.37	m^2 year / 1/4 lb	3.26284	single product	3.11145	3.41652	min, max of sensitivity analysis	20	g protein / 4 oz	176.37	1.85	1.76416	1.93713	Only reported here GHGe, land and water use from ingredients and processing phase.
Khan et al. (2019)	plant-based meat substitute	Impossible Burger	soy protein	kg CO2e	1	3.47	kg CO2e / kg	3.47	single product	3.07343	3.96571	95% confidence interval	19	g protein / 4 oz	167.552	2.07101	1.83432	2.36686	CI reflects sensitivity analysis, which explored different energy grid and other variables. Only reported here emissions, land and water use from Impossible Burger mix and production phase.
Khan et al. (2019)	plant-based meat substitute	Impossible Burger	soy protein	L blue water footprint	1	106.62	L / kg	106.62	single product	56.7828	202.881	n/a	19	g protein / 4 oz	167.552	63.6342	33.8898	121.086
Khan et al. (2019)	plant-based meat substitute	Impossible Burger	soy protein	m^2 year	1	2.47	m^2 year / kg	2.47	single product	1.5808	3.6556	95% confidence interval	19	g protein / 4 oz	167.552	1.47417	0.943471	2.18178
Mattick et al. (2015)	cell-based meat	not specified	feedstock: Glucose, glutamine, soy hydrolysate and basal media	kg CO2e	1	7.5	kg CO2e / 1 kg	7.5	single product	3.6	25.4	lowest, highest values from sensitivity analysis	7	% protein by mass	70	10.7143	5.14286	36.2857
Mattick et al. (2015)	cell-based meat	not specified	feedstock: Glucose, glutamine, soy hydrolysate and basal media	m^2 year	1	5.5	m^2 year / kg	5.5	single product	2.332	8.03	min, max of sensitivity analysis	7	% protein by mass	70	7.85714	3.33143	11.4714
Miglietta et al. (2015)	insects	farmed mealworms from Netherlands	n/a	L blue water footprint	1	395.805	m^3 / ton	395.805	single product			n/a	186	g protein / 1 kg	186	212.798
Oonincx & de Boer (2012)	insects	farmed mealworms from Netherlands	n/a	kg CO2e	1	2.65	kg CO2e / kg	2.65	single product			n/a	14	kg CO2e / 1 kg protein		1.4			g protein / kg not used; footprint per unit of protein was reportedly directly by study
Oonincx & de Boer (2012)	insects	farmed mealworms from Netherlands	n/a	m^2 year	1	3.56	m^2 year / kg	3.56	single product			n/a	18	m^2 / 1 kg protein		1.8			g protein / kg not used; footprint per unit of protein was reportedly directly by study
Quorn Foods (2019)	plant-based meat substitute	Quorn Classic Burger (chilled)	mycoprotein (contains eggs)	kg CO2e	1	2.9	kg CO2e / kg	2.9	single product			n/a	18	g protein / 100 g	180	1.61111			Used protein content from product page on https://www.quorn.co.uk/products/ (reflects British products only)
Quorn Foods (2019)	plant-based meat substitute	Quorn Crispy Nuggets (frozen) - 260 g size	mycoprotein (contains eggs)	kg CO2e	1	1.4	kg CO2e / kg	1.4	single product			n/a	9.4	g protein / 100 g	94	1.48936			Used protein content from product page on https://www.quorn.co.uk/products/ (reflects British products only)
Quorn Foods (2019)	plant-based meat substitute	Quorn Crispy Nuggets (frozen) - 300 g size	mycoprotein (contains eggs)	kg CO2e	1	2.2	kg CO2e / kg	2.2	single product			n/a	9.4	g protein / 100 g	94	2.34043			Used protein content from product page on https://www.quorn.co.uk/products/ (reflects British products only)
Quorn Foods (2019)	plant-based meat substitute	Quorn Crispy Nuggets (frozen) - 476 g size	mycoprotein (contains eggs)	kg CO2e	1	2.1	kg CO2e / kg	2.1	single product			n/a	9.4	g protein / 100 g	94	2.23404			Used protein content from product page on https://www.quorn.co.uk/products/ (reflects British products only)
Quorn Foods (2019)	plant-based meat substitute	Quorn Fillets (frozen)	mycoprotein (contains eggs)	kg CO2e	1	1.15	kg CO2e / kg	1.15	single product			n/a	12.5	g protein / 100 g	125	0.92			Technically a plant-based seafood subsitute, but we have classified this as a "meat substitute" given the similarity of ingredients. Used protein content from product page on https://www.quorn.co.uk/products/ (reflects British products only)
Quorn Foods (2019)	plant-based meat substitute	Quorn Mince (chilled)	mycoprotein (contains eggs)	kg CO2e	1	2.2	kg CO2e / kg	2.2	single product			n/a	14.5	g protein / 100 g	145	1.51724			Used protein content from product page on https://www.quorn.co.uk/products/ (reflects British products only)
Quorn Foods (2019)	plant-based meat substitute	Quorn Mince (frozen)	mycoprotein (contains eggs)	kg CO2e	1	1.2	kg CO2e / kg	1.2	single product			n/a	14.5	g protein / 100 g	145	0.827586			Used protein content from product page on https://www.quorn.co.uk/products/ (reflects British products only)
Quorn Foods (2019)	plant-based meat substitute	Quorn Mini Cocktail Sausage (chilled)	mycoprotein (contains eggs)	kg CO2e	1	3	kg CO2e / kg	3	single product			n/a	12.9	g protein / 100 g	129	2.32558			Used protein content from product page on https://www.quorn.co.uk/products/ (reflects British products only)
Quorn Foods (2019)	plant-based meat substitute	Quorn Pieces (chilled)	mycoprotein (contains eggs)	kg CO2e	1	2.1	kg CO2e / kg	2.1	single product			n/a	13.8	g protein / 100 g	138	1.52174			Used protein content from product page on https://www.quorn.co.uk/products/ (reflects British products only)
Quorn Foods (2019)	plant-based meat substitute	Quorn Pieces (frozen)	mycoprotein (contains eggs)	kg CO2e	1	1.2	kg CO2e / kg	1.2	single product			n/a	13.8	g protein / 100 g	138	0.869565			Used protein content from product page on https://www.quorn.co.uk/products/ (reflects British products only)
Quorn Foods (2019)	plant-based meat substitute	Quorn Sausages (chilled)	mycoprotein (contains eggs)	kg CO2e	1	2.5	kg CO2e / kg	2.5	single product			n/a	11.2	g protein / 100 g	112	2.23214			Used protein content from product page on https://www.quorn.co.uk/products/ (reflects British products only)
Quorn Foods (2019)	plant-based meat substitute	Quorn Sausages (frozen)	mycoprotein (contains eggs)	kg CO2e	1	1.6	kg CO2e / kg	1.6	single product			n/a	11.2	g protein / 100 g	112	1.42857			Used protein content from product page on https://www.quorn.co.uk/products/ (reflects British products only)
Quorn Foods (2019)	plant-based meat substitute	Quorn Battered Salt & Vinegar Fishless Fillet (frozen)	mycoprotein (without eggs)	kg CO2e	1	1.5	kg CO2e / kg	1.5	single product			n/a	4.5	g protein / 100 g	45	3.33333			Technically a plant-based seafood subsitute, but we have classified this as a "meat substitute" given the similarity of ingredients. Used protein content from product page on https://www.quorn.co.uk/products/ (reflects British products only)
Quorn Foods (2019)	plant-based meat substitute	Quorn Breaded Lemon & Pepper Fishless Fillet (frozen)	mycoprotein (without eggs)	kg CO2e	1	1.5	kg CO2e / kg	1.5	single product			n/a	4.5	g protein / 100 g	45	3.33333			Technically a plant-based seafood subsitute, but we have classified this as a "meat substitute" given the similarity of ingredients. Used protein content from product page on https://www.quorn.co.uk/products/ (reflects British products only)
Quorn Foods (2019)	plant-based meat substitute	Quorn Fishless Fingers (frozen)	mycoprotein (without eggs)	kg CO2e	1	1.5	kg CO2e / kg	1.5	single product			n/a	4.5	g protein / 100 g	45	3.33333			Technically a plant-based seafood subsitute, but we have classified this as a "meat substitute" given the similarity of ingredients. Used protein content from product page on https://www.quorn.co.uk/products/ (reflects British products only)
Quorn Foods (2019)	plant-based meat substitute	Quorn Vegan Breaded Fillet (frozen)	mycoprotein (without eggs)	kg CO2e	1	1.5	kg CO2e / kg	1.5	single product			n/a	11	g protein / 100 g	110	1.36364			Technically a plant-based seafood subsitute, but we have classified this as a "meat substitute" given the similarity of ingredients. Used protein content from product page on https://www.quorn.co.uk/products/ (reflects British products only)
Quorn Foods (2019)	plant-based meat substitute	Quorn Vegan Chicken-Free Slices (chilled)	mycoprotein (without eggs)	kg CO2e	1	3.1	kg CO2e / kg	3.1	single product			n/a	11	g protein / 100 g	110	2.81818			Used protein content from product page on https://www.quorn.co.uk/products/ (reflects British products only)
Quorn Foods (2019)	plant-based meat substitute	Quorn Vegan Fillets (frozen)	mycoprotein (without eggs)	kg CO2e	1	1.7	kg CO2e / kg	1.7	single product			n/a	14.2	g protein / 100 g	142	1.19718			Technically a plant-based seafood subsitute, but we have classified this as a "meat substitute" given the similarity of ingredients. Used protein content from product page on https://www.quorn.co.uk/products/ (reflects British products only)
Quorn Foods (2019)	plant-based meat substitute	Quorn Vegan Ham-Free Slices (chilled)	mycoprotein (without eggs)	kg CO2e	1	3.1	kg CO2e / kg	3.1	single product			n/a	13.5	g protein / 100 g	135	2.2963			Used protein content from product page on https://www.quorn.co.uk/products/ (reflects British products only)
Quorn Foods (2019)	plant-based meat substitute	Quorn Vegan Hot & Spicy Burger (frozen)	mycoprotein (without eggs)	kg CO2e	1	1.5	kg CO2e / kg	1.5	single product			n/a	11.1	g protein / 100 g	111	1.35135			Used protein content from product page on https://www.quorn.co.uk/products/ (reflects British products only)
Quorn Foods (2019)	plant-based meat substitute	Quorn Vegan Nuggets (frozen)	mycoprotein (without eggs)	kg CO2e	1	3	kg CO2e / kg	3	single product			n/a	12	g protein / 100 g	120	2.5			Used protein content from product page on https://www.quorn.co.uk/products/ (reflects British products only)
Quorn Foods (2019)	plant-based meat substitute	Quorn Vegan Pieces (frozen)	mycoprotein (without eggs)	kg CO2e	1	1.4	kg CO2e / kg	1.4	single product			n/a	15.3	g protein / 100 g	153	0.915033			Used protein content from product page on https://www.quorn.co.uk/products/ (reflects British products only)
Seves et al. (2017)	plant-based meat substitute	luncheon meat (veg)	not reported	kg CO2e	1	1.5	kg CO2e / kg	1.5	single product			n/a	15	g protein / 100 g	150	1
Seves et al. (2017)	plant-based meat substitute	mincemeat (veg)	not reported	kg CO2e	1	2.2	kg CO2e / kg	2.2	single product			n/a	19.1	g protein / 100 g	191	1.15183
Seves et al. (2017)	plant-based meat substitute	mincemeat balls (veg)	not reported	kg CO2e	1	2.2	kg CO2e / kg	2.2	single product			n/a	17	g protein / 100 g	170	1.29412
Seves et al. (2017)	plant-based meat substitute	nuggets (veg)	not reported	kg CO2e	1	1.5	kg CO2e / kg	1.5	single product			n/a	15	g protein / 100 g	150	1
Seves et al. (2017)	plant-based meat substitute	paté (veg)	not reported	kg CO2e	1	1.5	kg CO2e / kg	1.5	single product			n/a	7.8	g protein / 100 g	78	1.92308
Seves et al. (2017)	plant-based meat substitute	sausage (veg)	not reported	kg CO2e	1	1.5	kg CO2e / kg	1.5	single product			n/a	13.3	g protein / 100 g	133	1.12782
Seves et al. (2017)	plant-based meat substitute	luncheon meat (veg)	not reported	m^2 year	1	1.7	m^2 year / kg	1.7	single product			n/a	15	g protein / 100 g	150	1.13333
Seves et al. (2017)	plant-based meat substitute	mincemeat (veg)	not reported	m^2 year	1	2.7	m^2 year / kg	2.7	single product			n/a	19.1	g protein / 100 g	191	1.41361
Seves et al. (2017)	plant-based meat substitute	mincemeat balls (veg)	not reported	m^2 year	1	2.7	m^2 year / kg	2.7	single product			n/a	17	g protein / 100 g	170	1.58824
Seves et al. (2017)	plant-based meat substitute	nuggets (veg)	not reported	m^2 year	1	1.7	m^2 year / kg	1.7	single product			n/a	15	g protein / 100 g	150	1.13333
Seves et al. (2017)	plant-based meat substitute	paté (veg)	not reported	m^2 year	1	1.7	m^2 year / kg	1.7	single product			n/a	7.8	g protein / 100 g	78	2.17949
Seves et al. (2017)	plant-based meat substitute	sausage (veg)	not reported	m^2 year	1	1.7	m^2 year / kg	1.7	single product			n/a	13.3	g protein / 100 g	133	1.2782
Smetana et al. (2015)	cell-based meat	not specified	cyanobacteria feedstock	kg CO2e	1	23.9-24.64	kg CO2e / 1 kg	24.27	single product; mean of min, max	23.9	24.64	min, max	26	% protein by mass	260	9.33462	9.19231	9.47692	The kg CO2e per kg product values from this study were based on an extrapolated analysis of Tuomisto et al (2011) figures.
Smetana et al. (2015)	plant-based meat substitute	Quorn	mycoprotein (contains eggs)	kg CO2e	1	5.6-6.2	kg CO2e / kg	5.85	single product; mean of min, max	5.55	6.15	min, max	10	% protein by mass	100	5.85	5.55	6.15	The kg CO2e per kg product values from this study were based on an extrapolated analysis of Raats (2007) and Finnigan et al. (2010) figures. Protein content was not reported; used protein content for mycoprotein-based meat analog (10% for final product, wet content), as reported in Smetana et al. (2015).
Smetana et al. (2015)	cell-based meat	not specified	cyanobacteria feedstock	m^2 year	1	0.39–0.77	m^2 year / kg	0.58	single product; mean of min, max	0.39	0.77	min, max	26	% protein by mass	260	0.223077	0.15	0.296154
Smetana et al. (2015)	plant-based meat substitute	Quorn	mycoprotein (contains eggs)	m^2 year	1	0.79 - 0.84	m^2 year / kg	0.815	single product; mean of min, max	0.79	0.84	min, max	10	% protein by mass	100	0.815
Tuomisto & Teixeira de Mattos (2011)	cell-based meat	minced-beef type product (modeled in California)	cyanobacteria feedstock	kg CO2e	1	2235	kg CO2e / 1000 kg	2.235	single product	2.036	2.663	lowest, highest values from sensitivity analysis	19	% protein by mass	190	1.17632	1.07158	1.40158
Tuomisto & Teixeira de Mattos (2011)	cell-based meat	minced-beef type product (modeled in Spain)	cyanobacteria feedstock	kg CO2e	1	1896	kg CO2e / 1000 kg	1.896	single product	1.696	2.31	lowest, highest values from sensitivity analysis	19	% protein by mass	190	0.997895	0.892632	1.21579
Tuomisto & Teixeira de Mattos (2011)	cell-based meat	minced-beef type product (modeled in Thailand)	cyanobacteria feedstock	kg CO2e	1	1891	kg CO2e / 1000 kg	1.891	single product	1.692	2.29	lowest, highest values from sensitivity analysis	19	% protein by mass	190	0.995263	0.890526	1.20526
Tuomisto & Teixeira de Mattos (2011)	cell-based meat	minced-beef type product (modeled in California)	cyanobacteria feedstock	L blue water footprint	1	367	m^3 / 1000 kg	367	single product	282	565	n/a	19	% protein by mass	190	193.158	148.421	297.368	Estimated from Figure 3 using graph grabber; includes blue water consumption, indirect water use, and water used for muscle cultivation; the % of the total water footprint that excludes green water was applied to the higher and lower values
Tuomisto & Teixeira de Mattos (2011)	cell-based meat	minced-beef type product (modeled in Spain)	cyanobacteria feedstock	L blue water footprint	1	430	m^3 / 1000 kg	430	single product	275.134	536.264	n/a	19	% protein by mass	190	226.316	144.807	282.244	Estimated from Figure 3 using graph grabber; includes blue water consumption, indirect water use, and water used for muscle cultivation; the % of the total water footprint that excludes green water was applied to the higher and lower values
Tuomisto & Teixeira de Mattos (2011)	cell-based meat	minced-beef type product (modeled in Thailand)	cyanobacteria feedstock	L blue water footprint	1	111	m^3 / 1000 kg	111	single product	106.277	127.827	n/a	19	% protein by mass	190	58.4211	55.9351	67.2774	Estimated from Figure 3 using graph grabber; includes blue water consumption, indirect water use, and water used for muscle cultivation; the % of the total water footprint that excludes green water was applied to the higher and lower values
Tuomisto & Teixeira de Mattos (2011)	cell-based meat	minced-beef type product (modeled in California)	cyanobacteria feedstock	m^2 year	1	225	m^2 / 1000 kg	0.225	single product			n/a	19	% protein by mass	190	0.118421
Tuomisto & Teixeira de Mattos (2011)	cell-based meat	minced-beef type product (modeled in Spain)	cyanobacteria feedstock	m^2 year	1	232	m^2 / 1000 kg	0.232	single product			n/a	19	% protein by mass	190	0.122105
Tuomisto & Teixeira de Mattos (2011)	cell-based meat	minced-beef type product (modeled in Thailand)	cyanobacteria feedstock	m^2 year	1	189	m^2 / 1000 kg	0.189	single product			n/a	19	% protein by mass	190	0.0994737
Tuomisto et al. (2014)	cell-based meat	minced-beef type product	wheat feedstock	kg CO2e	1	3266–4379	kg CO2e / 1000 kg	3.8225	single product; mean of min, max	3.266	4.379	min, max	19	% protein by mass	190	2.01184	1.71895	2.30474
Tuomisto et al. (2014)	cell-based meat	minced-beef type product	corn feedstock	kg CO2e	1	2958–4071	kg CO2e / 1000 kg	3.5145	single product; mean of min, max	2.958	4.071	min, max	19	% protein by mass	190	1.84974	1.55684	2.14263
Tuomisto et al. (2014)	cell-based meat	minced-beef type product	cyanobacteria feedstock	kg CO2e	1	2268–3381	kg CO2e / 1000 kg	2.8245	single product; mean of min, max	2.268	3.381	min, max	19	% protein by mass	190	1.48658	1.19368	1.77947	Kg CO2e per kg product represents updated estimate on previous study, using corn-based feedstock rather than cyanobacteria, value reported in Lynch & Pierrehumbert (2019)
Tuomisto et al. (2014)	cell-based meat	minced-beef type product	corn feedstock	L blue water footprint	1	773.2	m^3 / 1000 kg	773.2	single product			n/a	19	% protein by mass	190	406.947
Tuomisto et al. (2014)	cell-based meat	minced-beef type product	cyanobacteria feedstock	L blue water footprint	1	442.6	m^3 / 1000 kg	442.6	single product			n/a	19	% protein by mass	190	232.947
Tuomisto et al. (2014)	cell-based meat	minced-beef type product	wheat feedstock	L blue water footprint	1	261.1	m^3 / 1000 kg	261.1	single product			n/a	19	% protein by mass	190	137.421
Tuomisto et al. (2014)	cell-based meat	minced-beef type product	corn feedstock	m^2 year	1	0.282	ha / 1000 kg	2.82	single product			n/a	19	% protein by mass	190	1.48421
Tuomisto et al. (2014)	cell-based meat	minced-beef type product	cyanobacteria feedstock	m^2 year	1	0.046	ha / 1000 kg	0.46	single product			n/a	19	% protein by mass	190	0.242105
Tuomisto et al. (2014)	cell-based meat	minced-beef type product	wheat feedstock	m^2 year	1	0.26	ha / 1000 kg	2.6	single product			n/a	19	% protein by mass	190	1.36842
Zhu & van Ierland (2010)	plant-based meat substitute	not specified	pea protein	kg CO2e	1	12260	kg CO2e / 4000 kg	3.065	single product		3.2325	high value from sensitivity analysis	25	% protein by mass	250	1.226		1.293
Zhu & van Ierland (2010)	plant-based meat substitute	not specified	pea protein	m^2 year	1	1.95	ha / 4000 kg	4.875	single product			n/a	25	% protein by mass	250	1.95
Zufia & Arana (2008)	tuna (wild)	canned tuna in tomato sauce from Spain fishery, w/out air transport	n/a	kg CO2e	1	5028.86	g CO2e / 2 kg	2.51443	single product			n/a	208	g protein / 1 kg	208	1.20886			Numbers reflected GHG emissions without air transportation. Protein content reported in Avadi et al. 2015 as 20.8%, using USDA numbers.

## Sheet: wtd avg by study
study	product type	footprint type	number of products included	wtd avg footprint / kg	wtd avg footprint / 100 g protein
Tuomisto et al. (2014)	cell-based meat	kg CO2e	3	3.38717	1.78272
Tuomisto & Teixeira de Mattos (2011)	cell-based meat	kg CO2e	3	2.00733	1.05649
Smetana et al. (2015)	cell-based meat	kg CO2e	1	24.27	9.33462
Mattick et al. (2015)	cell-based meat	kg CO2e	1	7.5	10.7143
Halloran et al. (2017)	insects	kg CO2e	1	2.57	0.435
Oonincx & de Boer (2012)	insects	kg CO2e	1	2.65	1.4
Smetana et al. (2015)	plant-based meat substitute	kg CO2e	1	5.85	5.85
Quorn Foods (2019)	plant-based meat substitute	kg CO2e	22	1.97045	1.89814
Seves et al. (2017)	plant-based meat substitute	kg CO2e	6	1.73333	1.24947
Khan et al. (2019)	plant-based meat substitute	kg CO2e	1	3.47	2.07101
Zhu & van Ierland (2010)	plant-based meat substitute	kg CO2e	1	3.065	1.226
Dettling et al. (2016)	plant-based meat substitute	kg CO2e	4	4.73225	1.3477
Blonk et al. (2008)	plant-based meat substitute	kg CO2e	1	2.24	2.24
Fresán et al. (2019)	plant-based meat substitute	kg CO2e	56	2.1875	1.08393
Heller & Keoleian (2018)	plant-based meat substitute	kg CO2e	1	2.38099	1.35
Head et al. (2011)	plant-based meat substitute	kg CO2e	1	2.4	2.4
Goldstein et al. (2017)	plant-based meat substitute	kg CO2e	1	6.93665	3.0531
Zufia & Arana (2008)	tuna (wild)	kg CO2e	1	2.51443	1.20886
Avadi et al. (2015)	tuna (wild)	kg CO2e	2	3.2	1.1685
Tuomisto et al. (2014)	cell-based meat	L blue water footprint	3	492.3	259.105
Tuomisto & Teixeira de Mattos (2011)	cell-based meat	L blue water footprint	3	302.667	159.298
Miglietta et al. (2015)	insects	L blue water footprint	1	395.805	212.798
Halloran et al. (2017)	insects	L blue water footprint	1	420	71
Goldstein et al. (2017)	plant-based meat substitute	L blue water footprint	1	180	79.2254
Heller & Keoleian (2018)	plant-based meat substitute	L blue water footprint	1	14.1096	8
Khan et al. (2019)	plant-based meat substitute	L blue water footprint	1	106.62	63.6342
Dettling et al. (2016)	plant-based meat substitute	L blue water footprint	4	36.5417	11.7268
Tuomisto et al. (2014)	cell-based meat	m^2 year	3	1.96	1.03158
Mattick et al. (2015)	cell-based meat	m^2 year	1	5.5	7.85714
Smetana et al. (2015)	cell-based meat	m^2 year	1	0.58	0.223077
Tuomisto & Teixeira de Mattos (2011)	cell-based meat	m^2 year	3	0.215333	0.113333
Oonincx & de Boer (2012)	insects	m^2 year	1	3.56	1.8
Blonk et al. (2008)	plant-based meat substitute	m^2 year	1	1.14	1.14
Goldstein et al. (2017)	plant-based meat substitute	m^2 year	1	3.5	1.54049
Dettling et al. (2016)	plant-based meat substitute	m^2 year	4	2.70833	0.803311
Zhu & van Ierland (2010)	plant-based meat substitute	m^2 year	1	4.875	1.95
Smetana et al. (2015)	plant-based meat substitute	m^2 year	1	0.815	0.815
Seves et al. (2017)	plant-based meat substitute	m^2 year	6	2.03333	1.45437
Khan et al. (2019)	plant-based meat substitute	m^2 year	1	2.47	1.47417
Head et al. (2011)	plant-based meat substitute	m^2 year	1	0.41	0.41
Heller & Keoleian (2018)	plant-based meat substitute	m^2 year	1	3.26284	1.85

## Sheet: product categories
product category	product type
aquatic meat	crustaceans (farmed)
aquatic meat	fish (farmed)
aquatic meat	fish (farmed in ponds)
aquatic meat	tuna (wild)
aquatic meat	fish (farmed excl. pond-raised)
meat alternative	cell-based meat
meat alternative	plant-based meat substitute
plant food	peas
plant food	other pulses (excl. peas)
plant food	pulses
plant food	soy
plant food	tofu
terrestrial animal product	beef (beef herd)
terrestrial animal product	beef (dairy herd)
terrestrial animal product	bovine meat
terrestrial animal product	pig meat
terrestrial animal product	poultry meat
terrestrial animal product	insects
terrestrial animal product	eggs

## Sheet: aggregated footprints
study	product type	footprint type	number of observations	avg footprint / kg	median footprint / kg	lower footprint / kg	higher footprint / kg	range description	avg footprint / 100 g protein	median footprint / 100 g protein	lower footprint / 100 g protein	higher footprint / 100 g protein	note
Kim et al. (2019)	bovine meat	L blue water footprint	200	537.433	325.463	245.328	529.675	25th, 75th percentile	273.878	165.857	125.02	269.924
Kim et al. (2019)	crustaceans (farmed)	L blue water footprint	45	8628.31	9258.57	7166.37	14516.6	25th, 75th percentile	4799.17	5150.21	3985.85	8076.86
Kim et al. (2019)	fish (farmed excl. pond-raised)	L blue water footprint	9	255.556	284	246	288	25th, 75th percentile	114.391	128.909	110.109	131.736
Kim et al. (2019)	fish (farmed in ponds)	L blue water footprint	60	5747.64	10705	5428	10810.5	25th, 75th percentile	2663.83	4961.54	2515.78	5010.48
Kim et al. (2019)	pig meat	L blue water footprint	181	442.59	523.067	388.287	847.022	25th, 75th percentile	300.167	354.747	263.339	574.456
Kim et al. (2019)	poultry meat	L blue water footprint	201	394.116	248.866	136.034	599.464	25th, 75th percentile	251.904	159.065	86.9478	383.154
Kim et al. (2019)	pulses	L blue water footprint	134	139.578	103.437	18.1969	203.149	25th, 75th percentile	65.0531	47.7676	8.56939	93.815
Kim et al. (2019)	soy	L blue water footprint	32	58.3613	212.503	50.7207	314.56	25th, 75th percentile	17.8134	64.8614	15.4813	96.0119
Poore & Nemecek (2019)	beef (beef herd)	kg CO2e	106	84.1601	51.0646	34.153	177.533	10th, 90th percentile	42.2067	25.6091	17.1279	89.0337	results for retail weight and per nutritional unit (data S2), converted to account for cradle to processor gate only (Fig S13)
Poore & Nemecek (2019)	beef (dairy herd)	kg CO2e	43	28.305	29.019	15.249	43.265	10th, 90th percentile	14.3389	14.7006	7.72492	21.9174	results for retail weight and per nutritional unit (data S2), converted to account for cradle to processor gate only (Fig S13)
Poore & Nemecek (2019)	crustaceans (farmed)	kg CO2e	21	18.0298	9.87041	5.39484	34.9725	10th, 90th percentile	12.207	6.68274	3.65257	23.6781	results for retail weight and per nutritional unit (data S2), converted to account for cradle to processor gate only (Fig S13)
Poore & Nemecek (2019)	eggs	kg CO2e	31	4.29173	3.86899	2.69267	7.71041	10th, 90th percentile	3.86782	3.48683	2.4267	6.94882	results for retail weight and per nutritional unit (data S2), converted to account for cradle to processor gate only (Fig S13)
Poore & Nemecek (2019)	fish (farmed)	kg CO2e	54	11.2584	6.51714	4.6669	21.8973	10th, 90th percentile	4.9368	2.85777	2.04644	9.60196	results for retail weight and per nutritional unit (data S2), converted to account for cradle to processor gate only (Fig S13)
Poore & Nemecek (2019)	other pulses (excl. peas)	kg CO2e	44	1.14739	0.89099	0.62818	2.40375	10th, 90th percentile	0.535913	0.416156	0.293405	1.12272	results for retail weight and per nutritional unit (data S2), converted to account for cradle to processor gate only (Fig S13)
Poore & Nemecek (2019)	peas	kg CO2e	33	0.735	0.6	0.42	1.2525	10th, 90th percentile	0.330783	0.270027	0.189019	0.563681	results for retail weight and per nutritional unit (data S2), converted to account for cradle to processor gate only (Fig S13)
Poore & Nemecek (2019)	pig meat	kg CO2e	75	9.56487	8.21289	5.75757	17.296	10th, 90th percentile	5.91154	5.07595	3.55845	10.6898	results for retail weight and per nutritional unit (data S2), converted to account for cradle to processor gate only (Fig S13)
Poore & Nemecek (2019)	poultry meat	kg CO2e	46	7.60977	5.79792	3.22278	15.5125	10th, 90th percentile	4.39363	3.34753	1.86073	8.95642	results for retail weight and per nutritional unit (data S2), converted to account for cradle to processor gate only (Fig S13)
Poore & Nemecek (2019)	tofu	kg CO2e	47	2.28152	1.86276	1.1552	4.0071	10th, 90th percentile	1.42595	1.16423	0.722	2.50444	results for retail weight and per nutritional unit (data S2), converted to account for cradle to processor gate only (Fig S13)
Poore & Nemecek (2019)	beef (beef herd)	m^2 year	106	326.21	170.37	82.84	735.09	10th, 90th percentile	163.596	85.4413	41.5446	368.651	results for retail weight and per nutritional unit (data S2)
Poore & Nemecek (2019)	beef (dairy herd)	m^2 year	43	43.24	25.94	14.39	64.12	10th, 90th percentile	21.9048	13.1408	7.28977	32.4823	results for retail weight and per nutritional unit (data S2)
Poore & Nemecek (2019)	crustaceans (farmed)	m^2 year	21	2.97	0.82	0.61	5.19	10th, 90th percentile	2.01083	0.555179	0.412999	3.51388	results for retail weight and per nutritional unit (data S2)
Poore & Nemecek (2019)	eggs	m^2 year	31	6.27	5.71	4.38	8.79	10th, 90th percentile	5.65068	5.146	3.94737	7.92177	results for retail weight and per nutritional unit (data S2)
Poore & Nemecek (2019)	fish (farmed)	m^2 year	54	8.41	5.6	0.82	10.5	10th, 90th percentile	3.68779	2.4556	0.35957	4.60425	results for retail weight and per nutritional unit (data S2)
Poore & Nemecek (2019)	other pulses (excl. peas)	m^2 year	44	15.57	12.24	9.93	41.25	10th, 90th percentile	7.2723	5.71695	4.63802	19.2667	results for retail weight and per nutritional unit (data S2)
Poore & Nemecek (2019)	peas	m^2 year	33	7.46	6.73	2.77	14.19	10th, 90th percentile	3.35734	3.0288	1.24662	6.38614	results for retail weight and per nutritional unit (data S2)
Poore & Nemecek (2019)	pig meat	m^2 year	75	17.36	13.44	7.76	31.11	10th, 90th percentile	10.7293	8.30655	4.79604	19.2274	results for retail weight and per nutritional unit (data S2)
Poore & Nemecek (2019)	poultry meat	m^2 year	46	12.22	11.01	6.65	16.02	10th, 90th percentile	7.05543	6.35681	3.83949	9.24942	results for retail weight and per nutritional unit (data S2)
Poore & Nemecek (2019)	tofu	m^2 year	47	3.52	3.41	1.77	4.94	10th, 90th percentile	2.2	2.13125	1.10625	3.0875	results for retail weight and per nutritional unit (data S2)

## Sheet: avg by product type
study	product category	product type	footprint type	number of studies	number of observations	avg footprint / kg	median footprint / kg	lower footprint / kg	higher footprint / kg	range description	avg footprint / 100 g protein	median footprint / 100 g protein	lower footprint / 100 g protein	higher footprint / 100 g protein	note
Poore & Nemecek (2019)	aquatic meat	crustaceans (farmed)	kg CO2e		21	18.0298	9.87041	5.39484	34.9725	10th, 90th percentile	12.207	6.68274	3.65257	23.6781	results for retail weight and per nutritional unit (data S2), converted to account for cradle to processor gate only (Fig S13)
Poore & Nemecek (2019)	aquatic meat	fish (farmed)	kg CO2e		54	11.2584	6.51714	4.6669	21.8973	10th, 90th percentile	4.9368	2.85777	2.04644	9.60196	results for retail weight and per nutritional unit (data S2), converted to account for cradle to processor gate only (Fig S13)
aggregated from multiple	aquatic meat	tuna (wild)	kg CO2e	2		2.85722	2.85722	2.51443	3.7	minimum, maximum product footprint	1.18868	1.18868	0.924658	1.39623
Kim et al. (2019)	aquatic meat	crustaceans (farmed)	L blue water footprint		45	8628.31	9258.57	7166.37	14516.6	25th, 75th percentile	4799.17	5150.21	3985.85	8076.86
Kim et al. (2019)	aquatic meat	fish (farmed excl. pond-raised)	L blue water footprint		9	255.556	284	246	288	25th, 75th percentile	114.391	128.909	110.109	131.736
Kim et al. (2019)	aquatic meat	fish (farmed in ponds)	L blue water footprint		60	5747.64	10705	5428	10810.5	25th, 75th percentile	2663.83	4961.54	2515.78	5010.48
Poore & Nemecek (2019)	aquatic meat	crustaceans (farmed)	m^2 year		21	2.97	0.82	0.61	5.19	10th, 90th percentile	2.01083	0.555179	0.412999	3.51388	results for retail weight and per nutritional unit (data S2)
Poore & Nemecek (2019)	aquatic meat	fish (farmed)	m^2 year		54	8.41	5.6	0.82	10.5	10th, 90th percentile	3.68779	2.4556	0.35957	4.60425	results for retail weight and per nutritional unit (data S2)
aggregated from multiple	meat alternative	cell-based meat	kg CO2e	4		9.29113	5.44358	1.692	25.4	minimum, maximum product footprint	5.72203	5.55867	0.890526	36.2857
aggregated from multiple	meat alternative	plant-based meat substitute	kg CO2e	11		3.36056	2.4	0.9	6.93665	minimum, maximum product footprint	2.16085	1.89814	0.25	6.15
aggregated from multiple	meat alternative	cell-based meat	L blue water footprint	2		397.483	397.483	106.277	773.2	minimum, maximum product footprint	209.202	209.202	55.9351	406.947
aggregated from multiple	meat alternative	plant-based meat substitute	L blue water footprint	4		84.3178	71.5808	13.3872	202.881	minimum, maximum product footprint	40.6466	37.6805	6.48062	121.086
aggregated from multiple	meat alternative	cell-based meat	m^2 year	4		2.06383	1.27	0.189	8.03	minimum, maximum product footprint	2.30628	0.627328	0.0994737	11.4714
aggregated from multiple	meat alternative	plant-based meat substitute	m^2 year	9		2.35717	2.47	0.41	5	minimum, maximum product footprint	1.27082	1.45437	0.27027	2.18178
Poore & Nemecek (2019)	plant food	other pulses (excl. peas)	kg CO2e		44	1.14739	0.89099	0.62818	2.40375	10th, 90th percentile	0.535913	0.416156	0.293405	1.12272	results for retail weight and per nutritional unit (data S2), converted to account for cradle to processor gate only (Fig S13)
Poore & Nemecek (2019)	plant food	peas	kg CO2e		33	0.735	0.6	0.42	1.2525	10th, 90th percentile	0.330783	0.270027	0.189019	0.563681	results for retail weight and per nutritional unit (data S2), converted to account for cradle to processor gate only (Fig S13)
Poore & Nemecek (2019)	plant food	tofu	kg CO2e		47	2.28152	1.86276	1.1552	4.0071	10th, 90th percentile	1.42595	1.16423	0.722	2.50444	results for retail weight and per nutritional unit (data S2), converted to account for cradle to processor gate only (Fig S13)
Kim et al. (2019)	plant food	pulses	L blue water footprint		134	139.578	103.437	18.1969	203.149	25th, 75th percentile	65.0531	47.7676	8.56939	93.815
Kim et al. (2019)	plant food	soy	L blue water footprint		32	58.3613	212.503	50.7207	314.56	25th, 75th percentile	17.8134	64.8614	15.4813	96.0119
Poore & Nemecek (2019)	plant food	other pulses (excl. peas)	m^2 year		44	15.57	12.24	9.93	41.25	10th, 90th percentile	7.2723	5.71695	4.63802	19.2667	results for retail weight and per nutritional unit (data S2)
Poore & Nemecek (2019)	plant food	peas	m^2 year		33	7.46	6.73	2.77	14.19	10th, 90th percentile	3.35734	3.0288	1.24662	6.38614	results for retail weight and per nutritional unit (data S2)
Poore & Nemecek (2019)	plant food	tofu	m^2 year		47	3.52	3.41	1.77	4.94	10th, 90th percentile	2.2	2.13125	1.10625	3.0875	results for retail weight and per nutritional unit (data S2)
Poore & Nemecek (2019)	terrestrial animal product	beef (beef herd)	kg CO2e		106	84.1601	51.0646	34.153	177.533	10th, 90th percentile	42.2067	25.6091	17.1279	89.0337	results for retail weight and per nutritional unit (data S2), converted to account for cradle to processor gate only (Fig S13)
Poore & Nemecek (2019)	terrestrial animal product	beef (dairy herd)	kg CO2e		43	28.305	29.019	15.249	43.265	10th, 90th percentile	14.3389	14.7006	7.72492	21.9174	results for retail weight and per nutritional unit (data S2), converted to account for cradle to processor gate only (Fig S13)
Poore & Nemecek (2019)	terrestrial animal product	eggs	kg CO2e		31	4.29173	3.86899	2.69267	7.71041	10th, 90th percentile	3.86782	3.48683	2.4267	6.94882	results for retail weight and per nutritional unit (data S2), converted to account for cradle to processor gate only (Fig S13)
aggregated from multiple	terrestrial animal product	insects	kg CO2e	2		2.61	2.61	2.57	2.65	minimum, maximum product footprint	0.9175	0.9175	0.435	1.4
Poore & Nemecek (2019)	terrestrial animal product	pig meat	kg CO2e		75	9.56487	8.21289	5.75757	17.296	10th, 90th percentile	5.91154	5.07595	3.55845	10.6898	results for retail weight and per nutritional unit (data S2), converted to account for cradle to processor gate only (Fig S13)
Poore & Nemecek (2019)	terrestrial animal product	poultry meat	kg CO2e		46	7.60977	5.79792	3.22278	15.5125	10th, 90th percentile	4.39363	3.34753	1.86073	8.95642	results for retail weight and per nutritional unit (data S2), converted to account for cradle to processor gate only (Fig S13)
Kim et al. (2019)	terrestrial animal product	bovine meat	L blue water footprint		200	537.433	325.463	245.328	529.675	25th, 75th percentile	273.878	165.857	125.02	269.924
aggregated from multiple	terrestrial animal product	insects	L blue water footprint	2		407.902	407.902	395.805	420.21	minimum, maximum product footprint	141.899	141.899	71	212.798
Kim et al. (2019)	terrestrial animal product	pig meat	L blue water footprint		181	442.59	523.067	388.287	847.022	25th, 75th percentile	300.167	354.747	263.339	574.456
Kim et al. (2019)	terrestrial animal product	poultry meat	L blue water footprint		201	394.116	248.866	136.034	599.464	25th, 75th percentile	251.904	159.065	86.9478	383.154
Poore & Nemecek (2019)	terrestrial animal product	beef (beef herd)	m^2 year		106	326.21	170.37	82.84	735.09	10th, 90th percentile	163.596	85.4413	41.5446	368.651	results for retail weight and per nutritional unit (data S2)
Poore & Nemecek (2019)	terrestrial animal product	beef (dairy herd)	m^2 year		43	43.24	25.94	14.39	64.12	10th, 90th percentile	21.9048	13.1408	7.28977	32.4823	results for retail weight and per nutritional unit (data S2)
Poore & Nemecek (2019)	terrestrial animal product	eggs	m^2 year		31	6.27	5.71	4.38	8.79	10th, 90th percentile	5.65068	5.146	3.94737	7.92177	results for retail weight and per nutritional unit (data S2)
aggregated from multiple	terrestrial animal product	insects	m^2 year	1		3.56	3.56	3.56	3.56	minimum, maximum product footprint	1.8	1.8	1.8	1.8
Poore & Nemecek (2019)	terrestrial animal product	pig meat	m^2 year		75	17.36	13.44	7.76	31.11	10th, 90th percentile	10.7293	8.30655	4.79604	19.2274	results for retail weight and per nutritional unit (data S2)
Poore & Nemecek (2019)	terrestrial animal product	poultry meat	m^2 year		46	12.22	11.01	6.65	16.02	10th, 90th percentile	7.05543	6.35681	3.83949	9.24942	results for retail weight and per nutritional unit (data S2)
